# Supplementary material for: Macrophage-engulfed MoS2for active targeted photothermal therapy
Source: Royal Society of Chemistry journal article supplement (doi:10.1039/c8nj05877f), 2019-01-01
Supplement: c8nj05877f1.pdf [file c8nj05877f1.pdf]

## Supporting information

### Macrophage engulfed MoS<sub>2</sub> for active targeting photothermal therapy

Chuanqi Song,<sup>b#</sup> Zizuo Li,<sup>c#</sup> Yaodong Chen,<sup>c</sup> Ce Zheng,<sup>a</sup> Narisu Hu,<sup>a\*</sup> Chongshen Guo<sup>b\*</sup>

---

<sup>a.</sup> *Oral Implant Center, Second Affiliated Hospital of Harbin Medical University, Harbin 150086, China*

<sup>b.</sup> *Key Laboratory of Microsystems and Micro-structures Manufacturing, Ministry of Education, Harbin Institute of Technology.*

<sup>c.</sup> *Department of Abdominal Ultrasonography, The First Affiliated Hospital of Harbin Medical University, Harbin, 150001, China.*

† Footnotes relating to the title and/or authors should appear here.

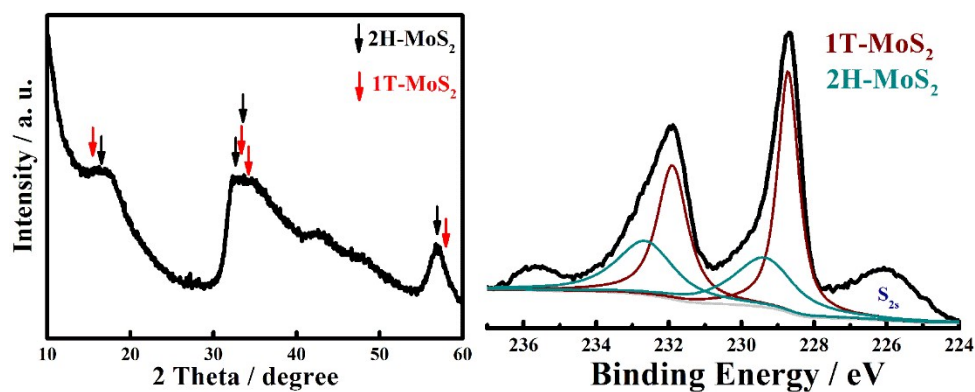

Figure S1. XRD pattern and Mo 3d XPS spectra of MoS<sub>2</sub>.

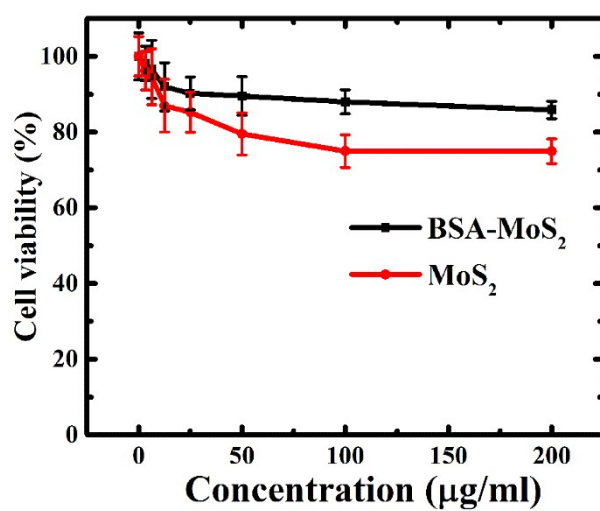

Figure. S2 Cell viability of HUVEC after incubation with different amount of MoS<sub>2</sub> or BSA-MoS<sub>2</sub> for 24 h.
